# Supplementary material for: Tracking of fruit, vegetables and unhealthy snacks consumption from childhood to adulthood (15 year period): does exposure to a free school fruit programme modify the observed tracking?
Source: PubMed Central journal article supplement (PMC6377717; doi:10.1186/s12966-019-0783-8), 2019-02-15
Supplement: 12966_2019_783_MOESM2_ESM.pdf [file 12966_2019_783_MOESM2_ESM.pdf]

## Tenk tilbake til i går tidlig

### 1. Spiste du frokost i går tidlig?

Ja  Nei

## Frokost

### 2. Spiste du frukt eller bær før du begynte på skolen i går tidlig?

Ja  Nei

Hvis ja, skriv ned hva slags og hvor mye **frukt** og **bær** du spiste her:

|  |  |
|--|--|
|  |  |
|--|--|

### 3. Spiste du grønnsaker før du begynte på skolen i går tidlig?

Ja  Nei

Hvis ja, skriv ned hva slags og hvor mye **grønnsaker** du spiste her:

|  |  |
|--|--|
|  |  |
|--|--|

### 4. Drakk du juice før du begynte på skolen i går tidlig?

Ja  Nei

Hvis ja, skriv ned hva slags og hvor mye **juice** du drakk her:

|  |  |
|--|--|
|  |  |
|--|--|

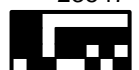

**Hva spiser du vanligvis?**

Når du fyller ut disse spørsmålene skal du tenke på hva du vanligvis spiser/drikker. Tenk gjerne på hva du har spist/drukket de siste 3 månedene. Tenk på både hva du spiser hjemme, på skolen og i fritiden. Kryss av i den ruten du føler passer best for deg.

**HUSK:** Kun ett kryss for hvert spørsmål!

**1. Hvor ofte spiser du potet?**

- Aldri
- Sjeldnere enn 1 gang i uken
- 1 gang i uken
- 2 ganger i uken
- 3 ganger i uken
- 4 ganger i uken
- 5 ganger i uken
- 6 ganger i uken
- Hver dag
- Flere ganger hver dag

**2. Hvor ofte spiser du grønnsaker til middag?**

- Aldri
- Sjeldnere enn 1 gang i uken
- 1 gang i uken
- 2 ganger i uken
- 3 ganger i uken
- 4 ganger i uken
- 5 ganger i uken
- 6 ganger i uken
- Hver dag
- Flere ganger hver dag

**3. Hvor ofte spiser du grønnsaker på brødsnivene? (f.eks. agurk, tomat, paprika)**

- Aldri
- Sjeldnere enn 1 gang i uken
- 1 gang i uken
- 2 ganger i uken
- 3 ganger i uken
- 4 ganger i uken
- 5 ganger i uken
- 6 ganger i uken
- Hver dag
- Flere ganger hver dag

**4. Hvor ofte spiser du andre grønnsaker? (f.eks. gulrot til skolematen)**

- Aldri
- Sjeldnere enn 1 gang i uken
- 1 gang i uken
- 2 ganger i uken
- 3 ganger i uken
- 4 ganger i uken
- 5 ganger i uken
- 6 ganger i uken
- Hver dag
- Flere ganger hver dag

**5. Hvor ofte spiser du eple, appelsin, pære og banan?**

- Aldri
- Sjeldnere enn 1 gang i uken
- 1 gang i uken
- 2 ganger i uken
- 3 ganger i uken
- 4 ganger i uken
- 5 ganger i uken
- 6 ganger i uken
- Hver dag
- Flere ganger hver dag
